# Supplementary material
Source: PubMed Central journal article supplement (PMC3805709)
Supplement: NIHMS513487-supplement-1.pdf [file NIHMS513487-supplement-1.pdf]

## A fluoride interloper in a CLC-type $\text{Cl}^-/\text{H}^+$ antiporter

Hyun-Ho Lim, Randy B. Stockbridge, and Christopher Miller

### Supplementary Information

#### Supplementary Results

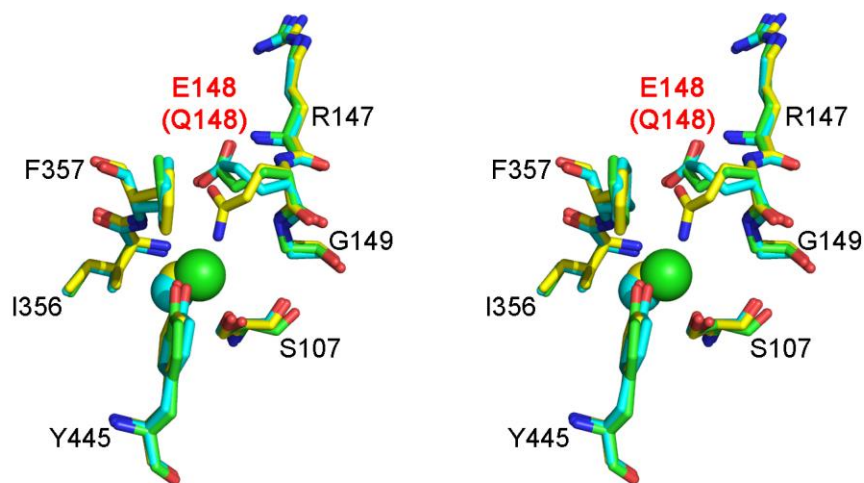

**Supplementary Figure 1. Stereo view of merged structures near central anion binding site.**

Crystal structures of wildtype CLC-ec1 with  $\text{Cl}^-$  (pdb #4ENE, *green*), with  $\text{F}^-$  (#4KJQ, *cyan*) and a mutant, E148Q with  $\text{F}^-$  (#4KK8, *yellow*) are displayed. Spheres indicate ions in each structure and are colored corresponding to the proteins.

**Supplementary Table 1. CLC-ec1 constructs: Metrics for ion transport<sup>a</sup>.**

| Protein             | Cl <sup>-</sup> transport (Cl <sup>-</sup> /sec) | F <sup>-</sup> transport (F <sup>-</sup> /sec) |
|---------------------|--------------------------------------------------|------------------------------------------------|
| Wildtype            | 410 ± 9                                          | 4 ± 1                                          |
| E148A               | 350 ± 13                                         | 680 ± 50                                       |
| E148Q               | 200 ± 8                                          | 6 ± 1                                          |
| E203Q               | 80 ± 4                                           | 5 ± 1                                          |
| Y445A               | 190 ± 10                                         | 1.3 ± 0.2                                      |
| EA/YA (E148A/Y445A) | 20200 ± 1000                                     | 6200 ± 300                                     |

<sup>a</sup> Cl<sup>-</sup> or F<sup>-</sup> transport was performed in 300-fold Cl<sup>-</sup> or F<sup>-</sup> gradient in symmetrical pH (inside – 300 KX, 25 Mes-NaOH, pH 6.0; outside – 300 K-isethionate, 1 KX, 25 Mes-NaOH, pH 6.0, where X indicates Cl<sup>-</sup> or F<sup>-</sup>) with proteoliposomes (0.5 – 5 µg protein / mg lipid). Each transport value represents mean ± s.e.m. of 3-4 separate experiments, using 1-3 protein preps.

**Supplementary Table 2. Thermodynamic parameters for anion binding.**

| Protein  | pH  | Anion                        | K <sub>D</sub> (mM) <sup>a</sup> | ΔG <sup>o</sup> (kcal / mol) | ΔH <sup>o</sup> (kcal / mol) | No. of binding sites  |
|----------|-----|------------------------------|----------------------------------|------------------------------|------------------------------|-----------------------|
| Wildtype | 6.0 | Cl <sup>-</sup>              | 0.48 ± 0.05                      | -4.51 ± 0.05                 | -6.6 ± 0.4                   | 1                     |
|          |     | F <sup>-</sup>               | 0.96 ± 0.07                      | -4.11 ± 0.05                 | -5.2 ± 0.2                   | 1                     |
|          | 7.5 | Cl <sup>-</sup> <sup>b</sup> | 0.74 ± 0.01                      | -4.30 ± 0.01                 | -5.0 ± 0.1                   | 1                     |
|          |     | F <sup>-</sup>               | 1.04 ± 0.05                      | -4.06 ± 0.03                 | -1.6 ± 0.2                   | 1                     |
| E148A    | 7.5 | Cl <sup>-</sup> <sup>c</sup> | 0.015 ± 0.002                    | -6.7 ± 0.1                   | -6.0 ± 0.6                   | 1.8                   |
|          |     | F <sup>-</sup>               | 0.21 ± 0.02                      | -5.02 ± 0.05                 | -1.1 ± 0.2                   | 1 (0.97) <sup>d</sup> |
| E148Q    | 7.5 | Cl <sup>-</sup> <sup>c</sup> | 0.07 ± 0.01                      | -5.7 ± 0.1                   | -0.5 ± 0.1                   | 2                     |
|          |     | F <sup>-</sup>               | 0.20 ± 0.01                      | -5.03 ± 0.04                 | -3.6 ± 0.2                   | 1 (0.77) <sup>d</sup> |

<sup>a</sup> obtained from 3-4 independent observations, each with 2-3 independent protein preps.

<sup>b</sup> adopted from Lim et al., *PLoS Biol.* **10**, e1001441 (2012).

<sup>c</sup> adopted from Picollo et al., *Nat. Struct. Mol. Biol.* **16**, 1294-1301 (2009).

<sup>d</sup> the number in parentheses were obtained from fitting the binding curve without pre-determination.

### Supplementary Table 3. Statistics for x-ray crystallography.

Table S3-A. *Wildtype CLC-ec1*

| Halide (mM)                                         | No halide                | 100 F <sup>-</sup>       | 100 F <sup>-</sup> + 20 Br <sup>-</sup> | 20 F <sup>-</sup> + 20Br <sup>-</sup> | 20 Br <sup>-</sup>       |
|-----------------------------------------------------|--------------------------|--------------------------|-----------------------------------------|---------------------------------------|--------------------------|
| PDB #                                               | 4KJP                     | 4KJQ                     | 4KJW                                    | 4KK5                                  | 4KK6                     |
| <b>Data collection</b>                              |                          |                          |                                         |                                       |                          |
| Space group                                         | C2                       | C2                       | C2                                      | C2                                    | C2                       |
| <i>a</i> , <i>b</i> , <i>c</i> (Å)                  | 232.4, 98.2, 171.0       | 231.3, 100.2, 170.0      | 231.7, 98.9, 172.9                      | 229.1, 98.2, 169.8                    | 231.4, 100.9, 171.7      |
| $\alpha$ , $\beta$ , $\gamma$ (°)                   | 90.0, 132.1, 90.0        | 90.0, 132.0, 90.0        | 90.0, 132.9, 90.0                       | 90.0, 131.7, 90.0                     | 90.0, 132.1, 90.0        |
| Resolution (Å) <sup>a</sup>                         | 25 – 3.2 (3.26 – 3.2)    | 40 – 2.88 (2.92 – 2.88)  | 40 – 3.03 (3.1 – 3.03)                  | 40 – 3.17 (3.26 – 3.17)               | 25 – 3.18 (3.26 – 3.18)  |
| <i>R</i> <sub>merge</sub>                           | 0.127 (0.781)            | 0.108 (0.947)            | 0.101 (0.612)                           | 0.112 (0.542)                         | 0.093 (0.612)            |
| <i>I</i> / $\sigma$                                 | 17.3 (1.5)               | 31.7 (1.5)               | 23.3 (1.7)                              | 17.9 (1.7)                            | 20.8 (1.6)               |
| Completeness (%)                                    | 99.5 (94.2)              | 100 (99.9)               | 100 (99.6)                              | 98.8 (94.2)                           | 99.6 (98.6)              |
| Redundancy                                          | 7.4 (6.3)                | 7.5 (6.9)                | 3.9 (3.4)                               | 3.8 (3.4)                             | 3.9 (3.6)                |
| Mosaicity (°)                                       | 0.66 – 1.07              | 0.53 – 0.83              | 0.51 – 1.27                             | 0.65 – 1.65                           | 0.51 – 0.90              |
| <b>Refinement</b>                                   |                          |                          |                                         |                                       |                          |
| Resolution (Å)                                      | 25 – 3.2                 | 40 – 2.88                | 40 – 3.03                               | 40 – 3.17                             | 25 – 3.18                |
| No. reflections                                     | 47156                    | 65389                    | 108408                                  | 91572                                 | 95417                    |
| <i>R</i> <sub>work</sub> / <i>R</i> <sub>free</sub> | 22.2 / 26.5              | 22.0 / 26.3              | 23.0 / 26.9                             | 23.2 / 27.1                           | 23.5 / 26.9              |
| No. atoms                                           |                          |                          |                                         |                                       |                          |
| Protein                                             | 13214                    | 13223                    | 13223                                   | 13223                                 | 13214                    |
| Ligand/ion                                          | -                        | 2                        | -                                       | -                                     | 4                        |
| Water                                               | -                        | -                        | -                                       | -                                     | -                        |
| B-factor                                            |                          |                          |                                         |                                       |                          |
| Protein                                             | 60.6                     | 59.8                     | 65.8                                    | 69.8                                  | 71.9                     |
| Ligand/ion                                          | -                        | 58.2                     | -                                       | -                                     | 115.5                    |
| Water                                               | -                        | -                        | -                                       | -                                     | -                        |
| R.m.s. deviations                                   |                          |                          |                                         |                                       |                          |
| Bond lengths (Å)                                    | 0.006                    | 0.009                    | 0.005                                   | 0.006                                 | 0.006                    |
| Bond angles (°)                                     | 0.83                     | 1.29                     | 0.80                                    | 0.81                                  | 0.76                     |
| Ramachandran plot <sup>b</sup>                      | 94.2 / 5.3 / 0.5         | 92.0 / 7.1 / 0.9         | 94.5 / 5.2 / 0.3                        | 93.1 / 6.3 / 0.6                      | 92.3 / 7.0 / 0.7         |
| Molprobrity (rank, %) <sup>c</sup>                  | 2.34 (98 <sup>th</sup> ) | 2.77 (83 <sup>rd</sup> ) | 2.34 (97 <sup>th</sup> )                | 2.39 (98 <sup>th</sup> )              | 2.41 (97 <sup>th</sup> ) |

(continued)

Supplementary Table 3-B. **E148A**

| Halide (mM)                                         | 100 F <sup>-</sup>       | 100 F <sup>-</sup> + 2 Br <sup>-</sup> | 100 F <sup>-</sup> + 20 Br <sup>-</sup> | 20 F <sup>-</sup> + 20Br <sup>-</sup> | 20 Br <sup>-</sup>       |
|-----------------------------------------------------|--------------------------|----------------------------------------|-----------------------------------------|---------------------------------------|--------------------------|
| PDB #                                               | 4KKL                     | 4KK9                                   | 4KKA                                    | 4KKB                                  | 4KKC                     |
| <b>Data collection</b>                              |                          |                                        |                                         |                                       |                          |
| Space group                                         | C2                       | C2                                     | C2                                      | C2                                    | C2                       |
| <i>a, b, c</i> (Å)                                  | 231.4, 100.1, 170.2      | 231.6, 98.9, 170.4                     | 232.2, 99.2, 170.2                      | 231.7, 97.5, 170.6                    | 231.2, 99.2, 170.5       |
| $\alpha, \beta, \gamma$ (°)                         | 90.0, 131.8, 90.0        | 90.0, 131.9, 90.9                      | 90.0, 131.9, 90.0                       | 90.0, 131.7, 90.0                     | 90.0, 132.0, 90.0        |
| Resolution (Å) <sup>a</sup>                         | 25 – 2.79 (2.85 – 2.79)  | 40 – 3.0 (3.05 – 3.0)                  | 40 – 3.0 (3.05 – 3.0)                   | 30 – 3.02 (3.07 – 3.02)               | 30 – 3.18 (3.26 – 3.18)  |
| <i>R</i> <sub>merae</sub>                           | 0.112 (0.866)            | 0.088 (0.625)                          | 0.094 (0.727)                           | 0.113 (0.680)                         | 0.134 (0.694)            |
| <i>I</i> / $\sigma$                                 | 42.7 (2.2)               | 19.6 (1.6)                             | 18.8 (1.5)                              | 22.0 (1.4)                            | 15.9 (1.5)               |
| Completeness (%)                                    | 99.8 (99.7)              | 100 (99.7)                             | 99.9 (99.5)                             | 99.9 (99.1)                           | 99.8 (98.2)              |
| Redundancy                                          | 7.5 (7.3)                | 3.9 (3.7)                              | 3.9 (3.7)                               | 3.8 (3.6)                             | 3.7 (3.2)                |
| Mosaicity (°)                                       | 0.51 – 0.96              | 0.39 – 0.56                            | 0.32 – 0.63                             | 0.58 – 1.44                           | 0.57 – 1.02              |
| <b>Refinement</b>                                   |                          |                                        |                                         |                                       |                          |
| Resolution (Å)                                      | 25 – 2.79                | 40 – 3.0                               | 40 – 3.0                                | 30 – 3.02                             | 30 – 3.18                |
| No. reflections                                     | 71781                    | 112618                                 | 112322                                  | 107647                                | 93236                    |
| <i>R</i> <sub>work</sub> / <i>R</i> <sub>free</sub> | 23.5 / 28.9              | 21.7 / 27.0                            | 22.0 / 26.5                             | 23.6 / 26.8                           | 21.3 / 26.3              |
| No. atoms                                           |                          |                                        |                                         |                                       |                          |
| Protein                                             | 13215                    | 13206                                  | 13206                                   | 13215                                 | 13215                    |
| Ligand/ion                                          | 4                        | -                                      | -                                       | -                                     | 6                        |
| Water                                               | -                        | -                                      | -                                       | -                                     | -                        |
| B-factor                                            |                          |                                        |                                         |                                       |                          |
| Protein                                             | 59.7                     | 56.6                                   | 61.2                                    | 76.4                                  | 56.3                     |
| Ligand/ion                                          | 52.5                     | -                                      | -                                       | -                                     | 85.7                     |
| Water                                               | -                        | -                                      | -                                       | -                                     | -                        |
| R.m.s. deviations                                   |                          |                                        |                                         |                                       |                          |
| Bond lengths (Å)                                    | 0.01                     | 0.009                                  | 0.01                                    | 0.005                                 | 0.009                    |
| Bond angles (°)                                     | 1.32                     | 1.30                                   | 1.28                                    | 0.81                                  | 1.26                     |
| Ramachandran plot <sup>b</sup>                      | 91.2 / 8.2 / 0.6         | 90.4 / 8.9 / 0.7                       | 92.0 / 7.2 / 0.8                        | 93.8 / 5.7 / 0.5                      | 90.6 / 8.5 / 0.9         |
| Molprobrity (rank, %) <sup>c</sup>                  | 2.85 (74 <sup>th</sup> ) | 2.94 (78 <sup>th</sup> )               | 2.83 (84 <sup>th</sup> )                | 2.37 (97 <sup>th</sup> )              | 2.82 (90 <sup>th</sup> ) |

(continued)

Supplementary Table 3-C. **E148Q**

| Halide (mM)                                         | No halide                | 100 F                    |
|-----------------------------------------------------|--------------------------|--------------------------|
| PDB #                                               | 4LOU                     | 4KK8                     |
| <b>Data collection</b>                              |                          |                          |
| Space group                                         | C2                       | C2                       |
| <i>a</i> , <i>b</i> , <i>c</i> (Å)                  | 231.6, 100.3, 171.0      | 231.2, 98.9, 170.0       |
| $\alpha$ , $\beta$ , $\gamma$ (°)                   | 90.0, 131.7, 90.0        | 90.0, 131.8, 90.0        |
| Resolution (Å) <sup>a</sup>                         | 40 – 2.98 (3.05 – 2.98)  | 25 – 2.86 (2.92 – 2.86)  |
| <i>R</i> <sub>merge</sub>                           | 0.121 (0.744)            | 0.130 (0.654)            |
| <i>I</i> / $\sigma$                                 | 26.1 (1.4)               | 33.8 (1.8)               |
| Completeness (%)                                    | 99.4 (91.6)              | 99.2 (88.5)              |
| Redundancy                                          | 7.3 (4.8)                | 7.3 (5.0)                |
| Mosaicity (°)                                       | 0.37 – 0.71              | 0.38 – 0.87              |
| <b>Refinement</b>                                   |                          |                          |
| Resolution (Å)                                      | 40 – 2.98                | 25 – 2.86                |
| No. reflections                                     | 58841                    | 65721                    |
| <i>R</i> <sub>work</sub> / <i>R</i> <sub>free</sub> | 21.0 / 25.3              | 21.0 / 25.6              |
| No. atoms                                           |                          |                          |
| Protein                                             | 13243                    | 13225                    |
| Ligand/ion                                          | -                        | 2                        |
| Water                                               | -                        | -                        |
| B-factor                                            |                          |                          |
| Protein                                             | 44.1                     | 64.4                     |
| Ligand/ion                                          | -                        | 58.4                     |
| Water                                               | -                        | -                        |
| R.m.s. deviations                                   |                          |                          |
| Bond lengths (Å)                                    | 0.01                     | 0.009                    |
| Bond angles (°)                                     | 1.27                     | 1.23                     |
| Ramachandran plot <sup>b</sup>                      | 91.5 / 8.0 / 0.5         | 92.9 / 6.5 / 0.6         |
| Molprobability (rank, %) <sup>c</sup>               | 2.63 (91 <sup>st</sup> ) | 2.64 (88 <sup>th</sup> ) |

<sup>a</sup> numbers in parentheses represent values for the highest resolution shell.

<sup>b</sup> percentage of residues in the favored / allowed / disallowed region.

<sup>c</sup> MolProbability score was calculated as described (Chen VB et al. MolProbability: all-atom structure validation for macromolecular crystallography. *Acta Crystallographica D* **66**, 12-21, 2010). The rank indicates that 100<sup>th</sup>-percentile is the best among the structures of comparable resolutions.

**Supplementary Table 4. Statistics for anomalous signals<sup>a</sup>**

| Protein | Halide (mM)                             | $\rho_{ano}$ <sup>b</sup> |                |                 |
|---------|-----------------------------------------|---------------------------|----------------|-----------------|
|         |                                         | <i>external</i>           | <i>central</i> | <i>internal</i> |
| WT      | 20 Br <sup>-</sup>                      | -                         | 17.8 ± 2.1     | 12.4 ± 1.8      |
|         | 20 F <sup>-</sup> + 20 Br <sup>-</sup>  | -                         | 9.9 ± 0.8      | 9.7 ± 0.6       |
|         | 100 F <sup>-</sup> + 20 Br <sup>-</sup> | -                         | -              | 6.0 ± 0.6       |
| E148A   | 20 Br <sup>-</sup>                      | 19.0 ± 2.0                | 17.8 ± 1.6     | 6.0 ± 0.5       |
|         | 20 F <sup>-</sup> + 20 Br <sup>-</sup>  | 30.2 ± 1.9                | 8.5 ± 0.8      | 4.8 ± 1.1       |
|         | 100 F <sup>-</sup> + 20 Br <sup>-</sup> | 22.9 ± 1.2                | -              | -               |
|         | 100 F <sup>-</sup> + 2 Br <sup>-</sup>  | 15.6 ± 0.9                | -              | -               |

<sup>a</sup> obtained from 6 observations (two subunits in the asymmetric unit were considered as independent observation)

<sup>b</sup> peak heights of anomalous densities were normalized to  $\sigma$ . Since anomalous signals appear less than  $4.0\sigma$  were not discernible from noise, only peaks  $>4.0\sigma$  were considered.
